# Supplementary material for: CD147 Expression Is Associated with Tumor Proliferation in Bladder Cancer via GSDMD
Source: Hindawi journal article supplement (doi:10.1155/2020/7638975), 2020-01-01

**Fig.1s**

**A**

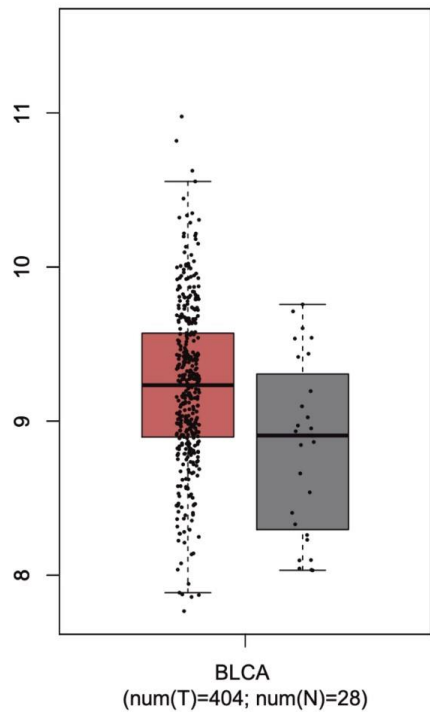

**B**

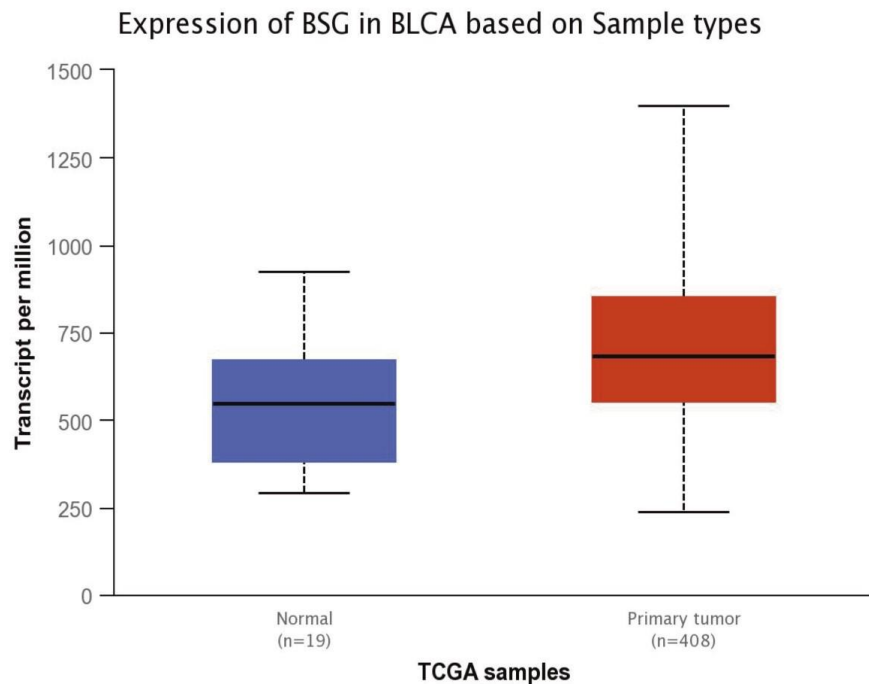

Supplement: f1 [file 7638975.f1.pdf]
